# Supplementary material for: Self-assembly of the imidazolium surfactant in aprotic ionic liquids. The anion effect of aprotic ionic liquids
Source: Royal Society of Chemistry journal article supplement (doi:10.1039/d4sm00699b), 2024-01-01
Supplement: d4sm00699b1.pdf [file d4sm00699b1.pdf]

## Supporting Information

### Self-assembly of the Imidazolium Surfactant in the Aprotic Ionic Liquids.

#### The Anion Effect of Aprotic Ionic Liquids

Pan Yue,<sup>a</sup> Zhao Chunhua,<sup>b,c</sup> Wang Ruirui,<sup>a</sup> Zhu Mingjie,<sup>a</sup> Zhuang Wenchang,<sup>a</sup> Li Qintang<sup>\*a</sup>

<sup>a</sup> School of Materials and Chemical Engineering, Xuzhou University of Technology, Xuzhou 221018, P. R. China

<sup>b</sup> State Key Laboratory of Offshore Oil and Gas Exploitation, Beijing 100028, P. R. China

<sup>c</sup> CNOOC Research Institute Ltd., Beijing 100028, P. R. China

ORCID:

Yue Pan: 0000-0001-9972-6917

Qintang Li: 0000-0001-6311-4281

Corresponding author:

Qintang Li

E-mail: liqintangwind@sina.com



$$I(q,a,\varepsilon) = \left(\frac{4}{3}\pi a^3 \Delta\eta\right)^2 \int_0^{\frac{\pi}{2}} K^2(q,a,\sqrt{\varepsilon^2 \cos^2\theta + \sin^2\theta}) \sin\theta d\theta \quad (\text{S5})$$

where  $a$  is the radius of the rotational axis,  $\varepsilon$  is ratio between radius of the semi-principle axes and equatorial axis.

The hard sphere structure factor with Percus-Yevick closure relation and decoupling approach was adopted for the interaction between micelles. The structure factor of hard sphere could expressed as,

$$S(q,R_{HS},f_q) = \frac{1}{1 + 24f_q \frac{G(f_q,R_{HS}q)}{R_{HS}q}} \quad (\text{S6})$$

where  $R_{HS}$  is the hard sphere repulsive radius;  $f_p$  is the volume fraction.

A constant was added in the background. More details could be found in the manual of SASfit.

### Calculation of the structural parameters of the $L_a$ phase

The lattice parameter ( $D$ ) of the lamellar liquid crystalline phase is obtained according to the equations S7-S10, where  $d_{IL}$  and  $d_a$  are thickness of the solvent and solvophobic layer.

$$D = \frac{2\pi}{q_1} \quad (\text{S7})$$

$$d_{IL} = D(1 - \Phi_a) \quad (\text{S8})$$

$$d_a = \frac{D - d_s}{2} \quad (\text{S9})$$

$$S = \frac{V_a}{2d_a} \quad (\text{S10})$$

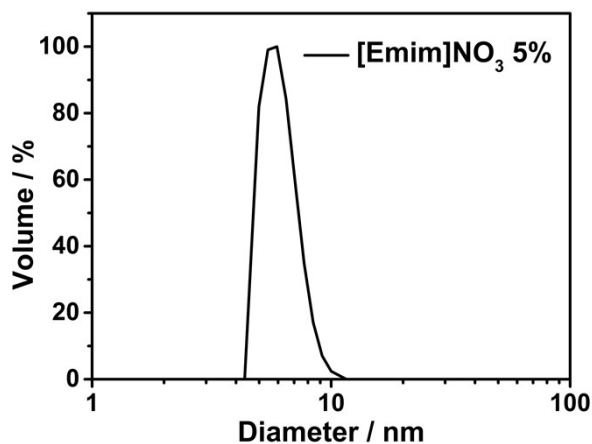

**Fig. S2** Size distribution of aggregates in the 5%  $C_{16}mimBr/[Emim]EtSO_4$  solution at  $60^\circ C$ .

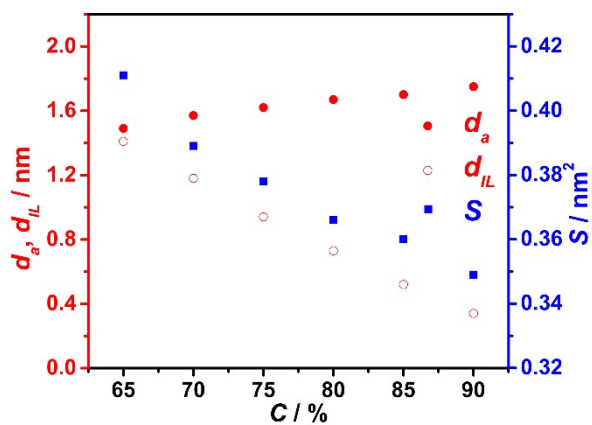

**Fig. S3** Structure parameters of the  $L_\alpha$  phases in the  $C_{16}mimBr/[Emim]NO_3$  system at  $60^\circ C$ .  $d_a$ , solvophobic region thickness;  $d_{IL}$ , solvent layer thickness;  $S$ , the area occupied by the surfactant molecules at the solvophilic/solvophobic interface.

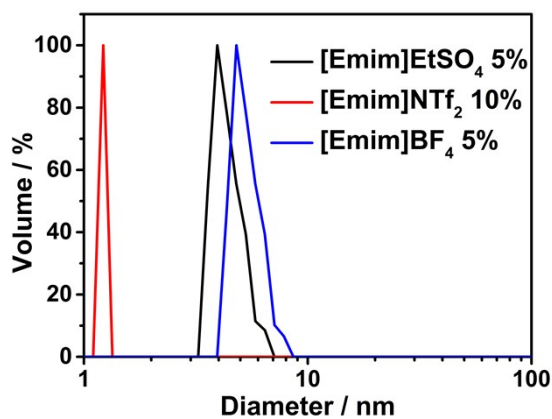

**Fig. S4** Size distribution of aggregates in the  $C_{16}mimBr/AiLs$  system at  $60^\circ C$  for different concentrations of  $C_{16}mimBr$ .

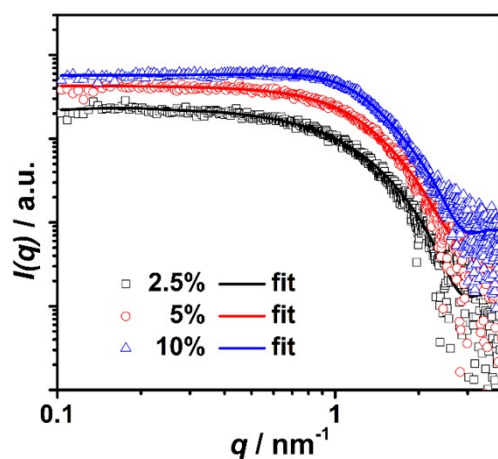

**Fig. S5** SAXS patterns of micelles in the  $C_{16}mimBr/[Emim]EtSO_4$  system at  $60^\circ C$  for different concentrations of  $C_{16}mimBr$ .

**Table S1** Parameters of micelles in the  $C_{16}mimBr/[Emim]EtSO_4$  system at  $60^\circ C$ .

| $C / \%$ | $a / nm$ | $b / nm$ | $\varepsilon$ | $N$ |
|----------|----------|----------|---------------|-----|
| 2.5      | 1.43     | 3.04     | 2.12          | 57  |
| 5        | 1.42     | 3.67     | 2.59          | 68  |
| 10       | 1.40     | 2.92     | 2.09          | 52  |

$a$ , the equal semi-axis;  $b$ , the principle semi-axis;  $\varepsilon$ , the axis ratio;  $N$ , the aggregation number.

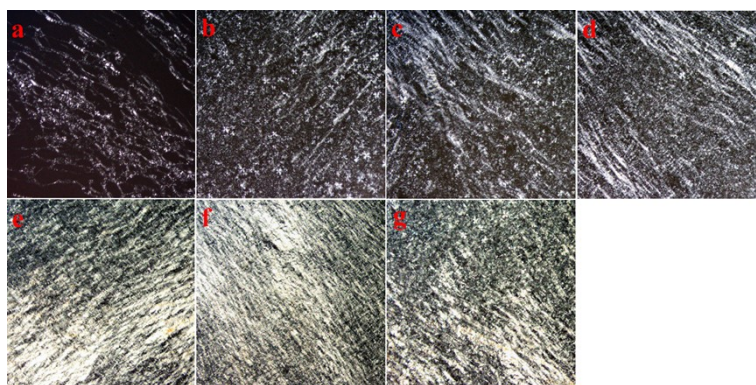

**Fig. S6** POM images of the  $L_\alpha$  phases in the  $C_{16}mimBr/[Emim]EtSO_4$  system at  $60^\circ C$ . The  $C_{16}mimBr$  concentrations are 60 % (a), 65 % (b), 70 % (c), 75 % (d), 80 % (e), 85 % (f) and 90 % (g).

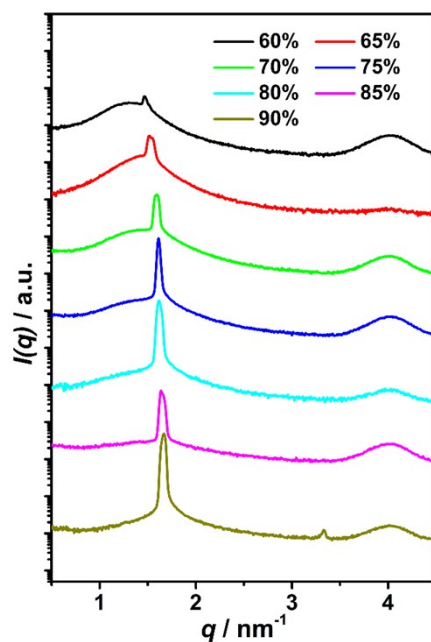

**Fig. S7** SAXS patterns of the  $L_\alpha$  phases in the  $C_{16}\text{mimBr}/[\text{Emim}]\text{EtSO}_4$  system at  $60^\circ\text{C}$  for different concentrations of  $C_{16}\text{mimBr}$ .

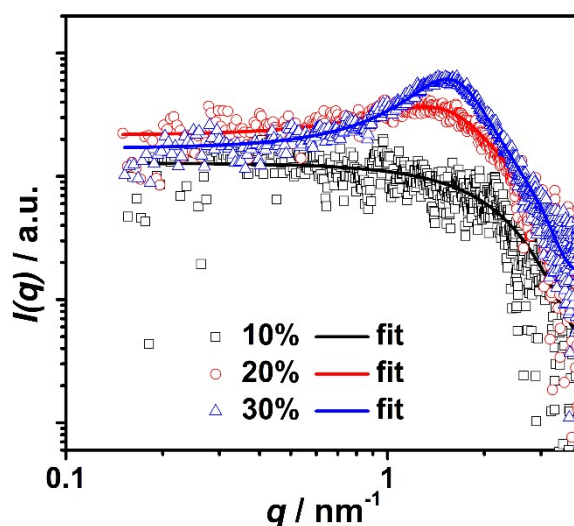

**Fig. S8** SAXS patterns of micelles in the  $C_{16}\text{mimBr}/[\text{Emim}]\text{NTf}_2$  system at  $60^\circ\text{C}$  for different concentrations of  $C_{16}\text{mimBr}$ .

**Table S2** Parameters of micelles in the  $C_{16}\text{mimBr}/[\text{Emim}]\text{NTf}_2$  system at  $60^\circ\text{C}$ .

| $C / \%$ | $a / \text{nm}$ | $b / \text{nm}$ | $\varepsilon$ | $N$ |
|----------|-----------------|-----------------|---------------|-----|
| 10       | 1.04            | 1.07            | 1.02          | 11  |
| 20       | 1.12            | 1.12            | 1.00          | 13  |
| 30       | 1.07            | 1.44            | 1.35          | 15  |

$a$ , the equal semi-axis;  $b$ , the principle semi-axis;  $\varepsilon$ , the axis ratio;  $N$ , aggregation number.

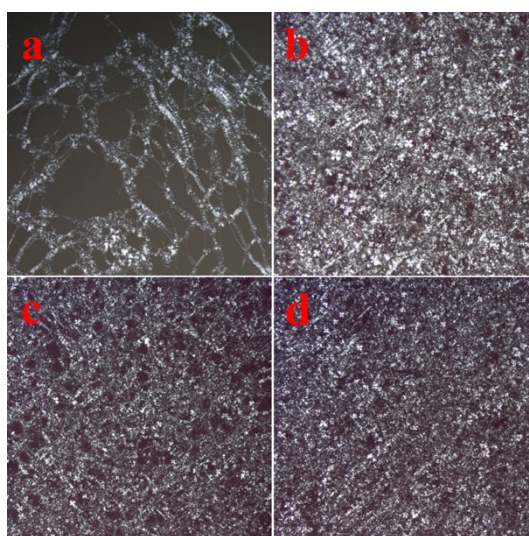

**Fig. S9** POM images of the  $L_\alpha$  phases in the  $C_{16}\text{mimBr}/[\text{Emim}]\text{NTf}_2$  system at  $60^\circ\text{C}$ . The  $C_{16}\text{mimBr}$  concentrations are 70 % (a), 75 % (b), 80 % (c) and 85 % (d).

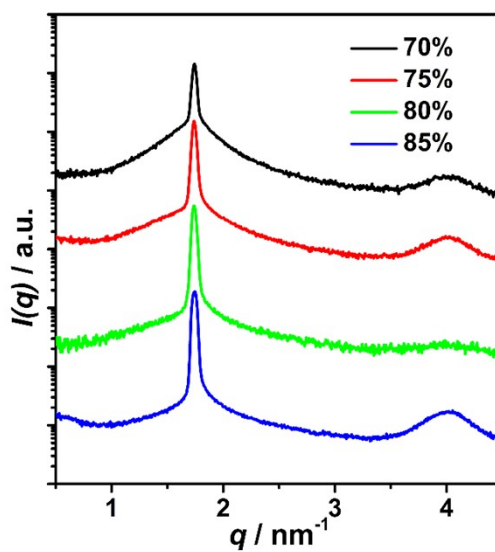

**Fig. S10** SAXS patterns of the  $L_\alpha$  phases in the  $C_{16}\text{mimBr}/[\text{Emim}]\text{NTf}_2$  system at  $60^\circ\text{C}$  for different concentrations of  $C_{16}\text{mimBr}$ .

**Table S3** CAC in the  $C_{16}\text{mimBr}/\text{AILs}$  system at  $60^\circ\text{C}$ .

| AIL                          | $X_M$  | $X_{L\alpha}$ |
|------------------------------|--------|---------------|
| $[\text{Emim}]\text{NO}_3$   | 0.0048 | 0.44          |
| $[\text{Emim}]\text{EtSO}_4$ | 0.0096 | 0.47          |
| $[\text{Emim}]\text{NTf}_2$  | -      | 0.69          |

$X_M$ , CMC in the molar ratio;  $X_{L\alpha}$ , CAC of the  $L_\alpha$  phase in the molar ratio.

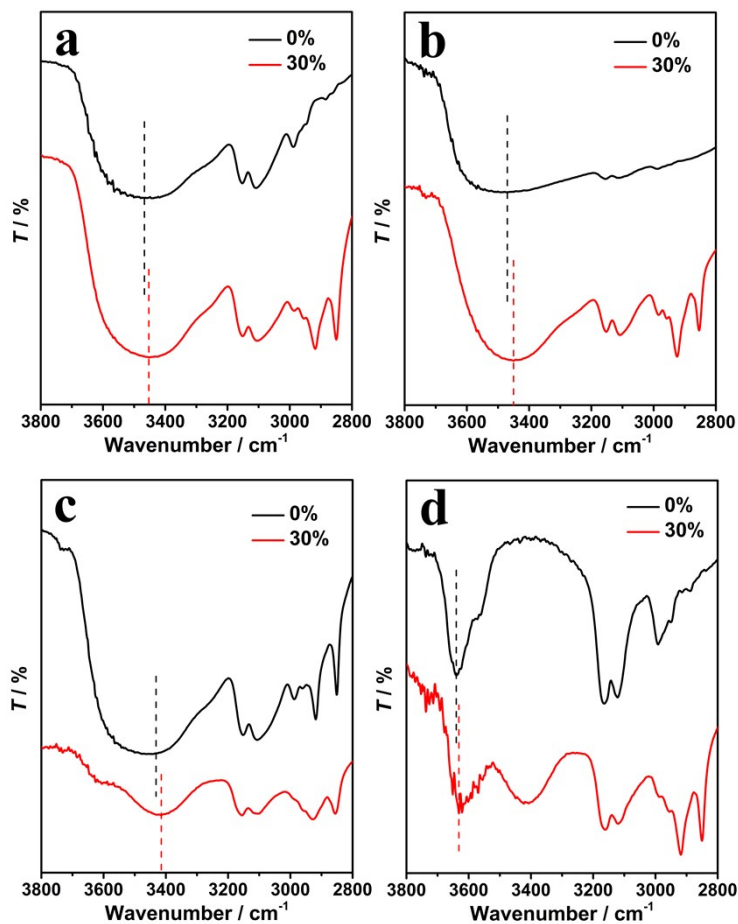

**Fig. S11** FTIR spectra of AILs and 30 % C<sub>16</sub>mimBr/AILs solutions. (a) [Emim]NO<sub>3</sub>; (b) [Emim]EtSO<sub>4</sub>; (c) [Emim]NTf<sub>2</sub>; (d) [Emim]BF<sub>4</sub>.

**Table S4** Rheology parameters of the 80 % C<sub>16</sub>mimBr/AIL  $L_\alpha$  phases at 60 °C.

| AIL                     | $A$  | $z$  |
|-------------------------|------|------|
| [Emim]NO <sub>3</sub>   | 2211 | 24.5 |
| [Emim]EtSO <sub>4</sub> | 3136 | 29.9 |
| [Emim]NTf <sub>2</sub>  | 4695 | 29.7 |
| [Emim]BF <sub>4</sub>   | 2403 | 23.1 |

$A$ , the number of flow units interacting with each other;  $z$ , the coordination number.



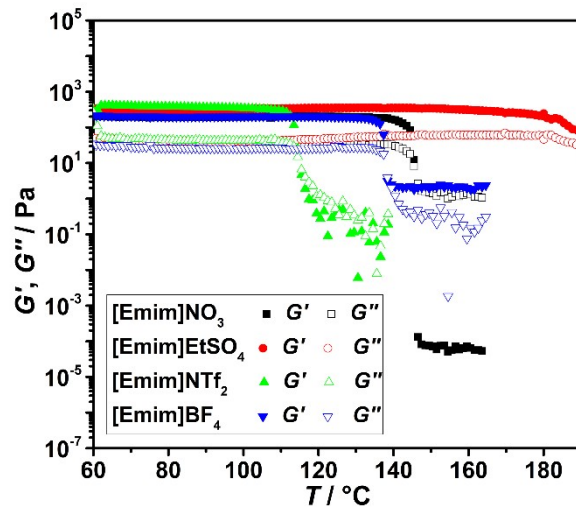

Fig. S12 Variations of  $G'$  and  $G''$  with temperature of the 80 %  $C_{16}mimBr/AIL$   $L_{\alpha}$  phases.

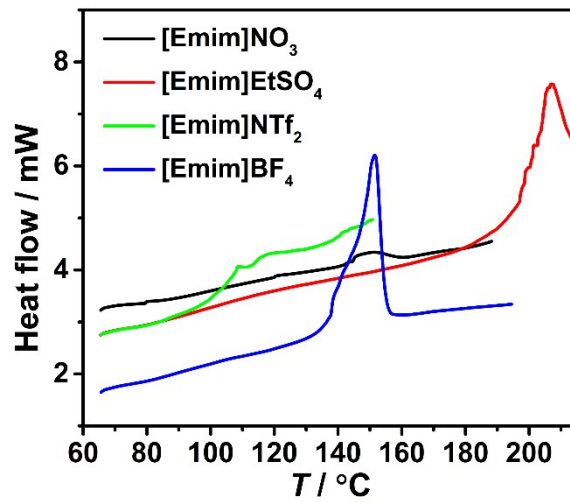

Fig. S13 DSC curves of the 80 %  $C_{16}mimBr/AIL$   $L_{\alpha}$  phases.

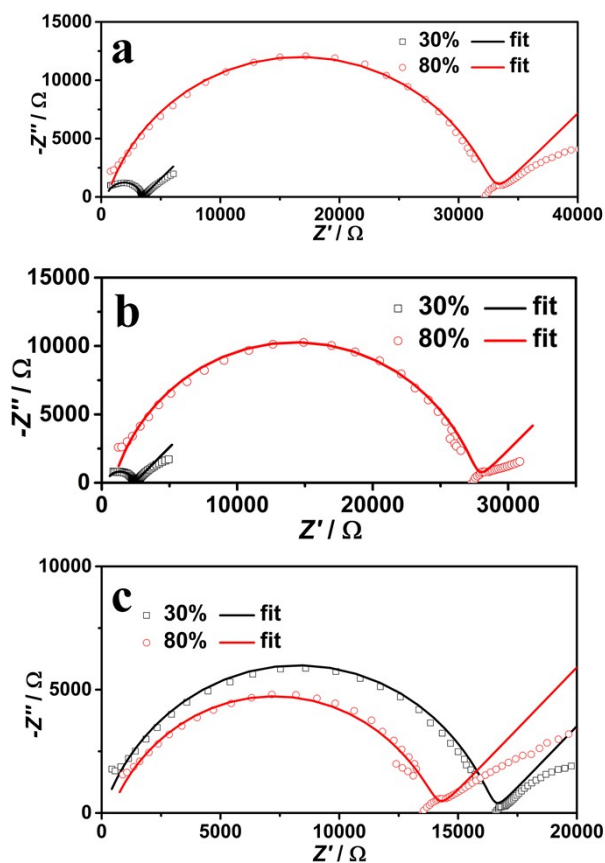

**Fig. S14** EIS results of the  $L_1$  and  $L_\alpha$  phases in different AILs at  $60^\circ\text{C}$ .  
 (a) EmimNO<sub>3</sub>; (b) EmimEtSO<sub>4</sub>; (c) EmimBF<sub>4</sub>.

**Table S5** Conductivity of the  $L_1$  and  $L_\alpha$  phases in different AILs at  $60^\circ\text{C}$ .

| AIL                   | $\sigma(\text{AIL}) /$<br>$\text{mS}\cdot\text{cm}^{-1}$ | $\sigma(L_1, 30\%) /$<br>$\text{mS}\cdot\text{cm}^{-1}$ | $\sigma(L_\alpha, 80\%) /$<br>$\text{mS}\cdot\text{cm}^{-1}$ |
|-----------------------|----------------------------------------------------------|---------------------------------------------------------|--------------------------------------------------------------|
| EmimNO <sub>3</sub>   | 18.6                                                     | 0.331                                                   | 0.0309                                                       |
| EmimEtSO <sub>4</sub> | 7.18                                                     | 0.479                                                   | 0.0373                                                       |
| EmimBF <sub>4</sub>   | 21.6                                                     | 0.0608                                                  | 0.0476                                                       |

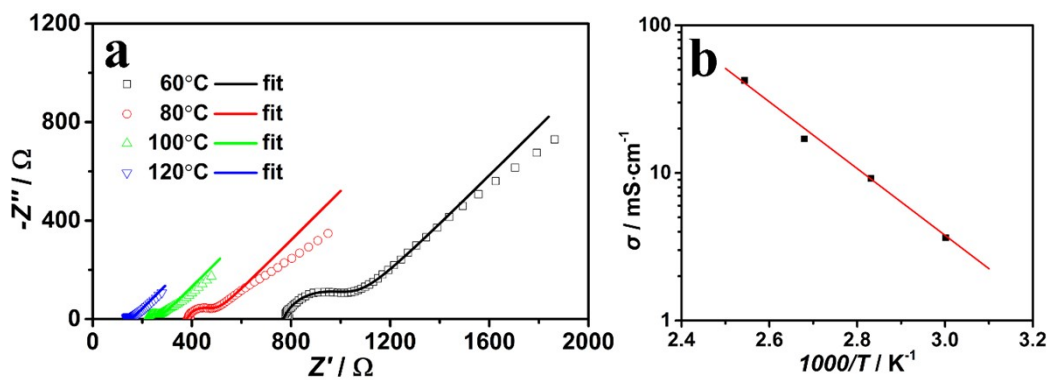

**Fig. S15** EIS results (a) and conductivity (b) of the 80 %  $\text{C}_{16}\text{mimBr}/[\text{Emim}]\text{NTf}_2$   $L_\alpha$  phase at different temperatures.
